# Supplementary material
Source: Springer Nature journal article supplement (https://www.springermedizin.de/resource/supplementary/13054_2009_8408_MOESM2_ESM.pdf/9731894)
Supplement: MOESM2 [file 9731894]

### **Observational period**

Admissions

January – July 2007  
(7 months), n = 429

Excluded  
n = 318

Included  
n = 111

Dropout  
n = 5

Completed  
n = 106

### **Intervention period**

Admissions

April – October 2008  
(7 months), n = 398

Excluded  
n = 286

Included  
n = 112

Dropout  
n = 3

Completed  
n = 109
